# Supplementary material for: Endothelium-Derived Extracellular Vesicles Associate with Poor Prognosis in Metastatic Colorectal Cancer
Source: PubMed Central journal article supplement (PMC7765205; doi:10.3390/cells9122688), 2020-12-15
Supplement: cells-09-02688-s001.pdf [file cells-09-02688-s001.pdf]

Article

# Endothelium-Derived Extracellular Vesicles Associated with Poor Prognosis in Metastatic Colorectal Cancer

Afroditi Nanou <sup>1,\*</sup>, Linda Mol <sup>2</sup>, Frank A.W. Coumans <sup>1</sup>, Miriam Koopman <sup>3</sup>, Cornelis J.A. Punt <sup>4</sup> and Leon W.M.M. Terstappen <sup>1,\*</sup>

<sup>1</sup> Department of Medical Cell BioPhysics, University of Twente, 7522ND Enschede, The Netherlands; f.a.w.coumans@utwente.nl

<sup>2</sup> Netherlands Comprehensive Cancer Organization, 6533AA Nijmegen, The Netherlands; L.Mol@ikn.nl

<sup>3</sup> Department of Medical Oncology, University Medical Center Utrecht, 3584CS Utrecht, The Netherlands; m.koopman-6@umcutrecht.nl

<sup>4</sup> Department of Epidemiology, Julius Center for Health Sciences and Primary Care, University Medical Center Utrecht, 3584CG Utrecht, The Netherlands; C.J.A.Punt@umcutrecht.nl

\* Correspondence: a.nanou@utwente.nl (A.N.); l.w.m.m.terstappen@utwente.nl (L.W.M.M.T); Tel.: +31-613-626-229 (A.N)

Received: 23 October 2020; Accepted: 11 December 2020; Published: 15 December 2020

**Table S1.** ACCEPT gates for the automated enumeration of tdEVs, edEVs, ldEVs, leukocytes and nucleated events.

| Gates\Marker                               | DNA <sup>a,b</sup> |                | CD45 <sup>a,b</sup>                 |                | CK <sup>a</sup> /CD105 <sup>b</sup> |                       |                            |                            | Marker <sup>1</sup> <sup>a,b</sup> |                |
|--------------------------------------------|--------------------|----------------|-------------------------------------|----------------|-------------------------------------|-----------------------|----------------------------|----------------------------|------------------------------------|----------------|
|                                            | Mean Intensity     | Mean Intensity | Mean Intensity                      | Max Intensity  | Perimeter (in pixels)               | Eccentricity          | Size (in $\mu\text{m}^2$ ) | Perimeter/Area             | Mean Intensity                     |                |
| tdEVs <sup>a</sup>                         | ≤5                 | ≤5             | >60                                 | >90            | >5                                  | ≤0.8                  | ≤150                       | ≤1                         | ≤5                                 |                |
| edEVs <sup>b</sup>                         | ≤5                 | ≤5             | >40                                 | >60            | >5                                  | ≤0.8                  | ≤150                       | ≤1                         | ≤5                                 |                |
|                                            | DNA <sup>a,b</sup> |                | CK <sup>a</sup> /CD105 <sup>b</sup> |                | CD45 <sup>a,b</sup>                 |                       |                            |                            | Marker <sup>1</sup> <sup>a,b</sup> |                |
|                                            | Mean Intensity     | Mean Intensity | Overlap with DNA                    | Mean Intensity | Max Intensity                       | Perimeter (in pixels) | Eccentricity               | Size (in $\mu\text{m}^2$ ) | Perimeter/Area                     | Mean Intensity |
| ldEVs <sup>a,b</sup>                       | ≤5                 | ≤5             | -                                   | >30            | >50                                 | >5                    | ≤0.8                       | ≤150                       | ≤1                                 | ≤5             |
| leukocytes <sup>a,b</sup>                  | >30                | ≤5             | -                                   | >30            | >50                                 | -                     | -                          | >16                        | -                                  | ≤5             |
| Nucleated <sup>a,b</sup>                   | >30                | ≤5             | -                                   | ≤5             | -                                   | -                     | -                          | >16                        | -                                  | ≤5             |
| CD105 <sup>+</sup> ldEVs <sup>b</sup>      | ≤5                 | >40            | -                                   | >30            | >50                                 | >5                    | ≤0.8                       | ≤150                       | ≤1                                 | ≤5             |
| CD105 <sup>+</sup> leukocytes <sup>b</sup> | >30                | >40            | >0.2                                | >30            | >50                                 | -                     | -                          | >16                        | -                                  | ≤5             |

The exponents a and b correspond to the CTC and CEC kit, respectively.

**Table S2.** Correlation between CBC-based parameters, CTC- and CEC- kit isolated objects of 395 mCRC patients using the Spearman's Rho correlation coefficient ( $\rho$ ). Correlation is considered to be weak for  $\rho < 0.4$  (in grey), moderate for  $0.4 \leq \rho < 0.6$  (in black) and strong for  $0.6 \leq \rho \leq 0.8$  (in bold black).

| Parameters       | CTC kit isolated |           |                |                |         | CEC kit isolated |                  |           |                |                |                |                |          |
|------------------|------------------|-----------|----------------|----------------|---------|------------------|------------------|-----------|----------------|----------------|----------------|----------------|----------|
|                  | Leukocytes       | Nucleated | IdEVs          | CTCs           | tdEVs   | Leukocytes       | CD105 Leukocytes | Nucleated | CD105 IdEVs    | IdEVs          | CECs           | edEVs          |          |
| CBC-based        | CBC Leukocytes   | .208 **   | .257**         | .170 **        | .276**  | .234 **          | .378 **          | .112*     | .299 **        | 0.023          | .227 **        | 0.009          | .238 **  |
|                  | CBC hemoglobin   | -0.072    | -.179**        | 0.038          | -.168** | -.167**          | -0.064           | -.202 **  | -.204**        | -.127*         | -.111*         | -.179 **       | -.315 ** |
|                  | CBC platelets    | 0.072     | .109 *         | 0.037          | .208**  | .197**           | .266 **          | .151 **   | .207 **        | 0.000          | .155 **        | 0.075          | .260 **  |
| CTC kit isolated | Leukocytes       | 1.000     | <b>.473 **</b> | <b>.437 **</b> | .160**  | .200**           | .172**           | .184 **   | .213**         | 0.022          | -0.054         | 0.065          | .164 **  |
|                  | Nucleated        |           | 1.000          | .366 **        | .119*   | .164 **          | .140**           | .212 **   | <b>.520 **</b> | -0.079         | -0.038         | 0.048          | .190**   |
|                  | IdEVs            |           |                | 1.000          | 0.036   | .186 **          | .196 **          | .135 **   | .143**         | -0.024         | 0.062          | 0.069          | .140**   |
|                  | CTCs             |           |                |                | 1.000   | <b>.694 **</b>   | -0.004           | -0.012    | -0.012         | -0.010         | 0.017          | 0.015          | .285**   |
|                  | tdEVs            |           |                |                |         |                  | 1.000            | -0.026    | 0.007          | -0.022         | 0.023          | -0.020         | 0.023    |
| CEC kit isolated | Leukocytes       |           |                |                |         | 1.000            | .202**           | .286 **   | 0.009          | <b>.459 **</b> | 0.033          | .142**         |          |
|                  | CD105 Leukocytes |           |                |                |         |                  | 1.000            | .184 **   | .218 **        | -0.013         | <b>.447 **</b> | <b>.417 **</b> |          |
|                  | Nucleated        |           |                |                |         |                  |                  | 1.000     | -0.007         | 0.041          | 0.015          | 0.058          |          |
|                  | CD105 IdEVs      |           |                |                |         |                  |                  |           | 1.000          | .178**         | .147 **        | .291 **        |          |
|                  | IdEVs            |           |                |                |         |                  |                  |           |                | 1.000          | -0.009         | .120 *         |          |
|                  | CECs             |           |                |                |         |                  |                  |           |                |                | 1.000          | <b>.450 **</b> |          |
|                  | edEVs            |           |                |                |         |                  |                  |           |                |                |                | 1.000          | 1.000    |

\*\* indicates significance at 0.01 level (2-tailed), \* indicates significance at 0.05 level (2-tailed).

**Table S3.** Correlation between clinical parameters and CTCs, tdEVs, CECs and edEVs of 395 mCRC patients using the Spearman's Rho correlation coefficient ( $\rho$ ). Correlation is considered to be weak for  $\rho < 0.4$  (in grey), moderate for  $0.4 \leq \rho < 0.6$  (in black) and strong for  $0.6 \leq \rho \leq 0.8$  (in bold black).

| Clinical parameter               | edEVs    | CECs     | tdEVs    | CTCs     |
|----------------------------------|----------|----------|----------|----------|
| Primary tumor in situ            | .146 **  | -0.074   | .323 **  | .295 **  |
| Presence of KRAS mutation        | -0.082   | -0.078   | -0.042   | -0.077   |
| Presence of BRAF mutation        | 0.086    | 0.078    | 0.003    | -0.037   |
| Presence of NRAS mutation        | -0.040   | 0.064    | -0.121   | -0.059   |
| Right sidedness of primary tumor | 0.081    | 0.060    | 0.056    | -0.009   |
| Treatment arm                    | -0.016   | -0.075   | 0.055    | 0.061    |
| Prior adjuvant therapy           | -.213 ** | -.109 *  | -.159 ** | -.133 ** |
| ECOG performance status          | .107 *   | 0.020    | .123 *   | .118 *   |
| gender                           | -0.008   | 0.051    | -0.050   | -.134 ** |
| Number of metastatic sites       | .110 *   | 0.019    | .112 *   | 0.084    |
| age                              | -0.043   | 0.045    | -0.093   | -.135 ** |
| Lactate dehydrogenase (LDH)      | .277 **  | 0.093    | .458 **  | .485 **  |
| Alkaline Phosphatase (ALP)       | .348 **  | 0.080    | .463 **  | .486 **  |
| CBC leukocytes                   | .238 **  | 0.009    | .234 **  | .276 **  |
| CBC hemoglobin                   | -.315 ** | -.179 ** | -.167 ** | -.168 ** |
| CBC platelets                    | .260 **  | 0.075    | .197 **  | .208 **  |

\*\* indicates significance at 0.01 level (2-tailed), \* indicates significance at 0.05 level (2-tailed).

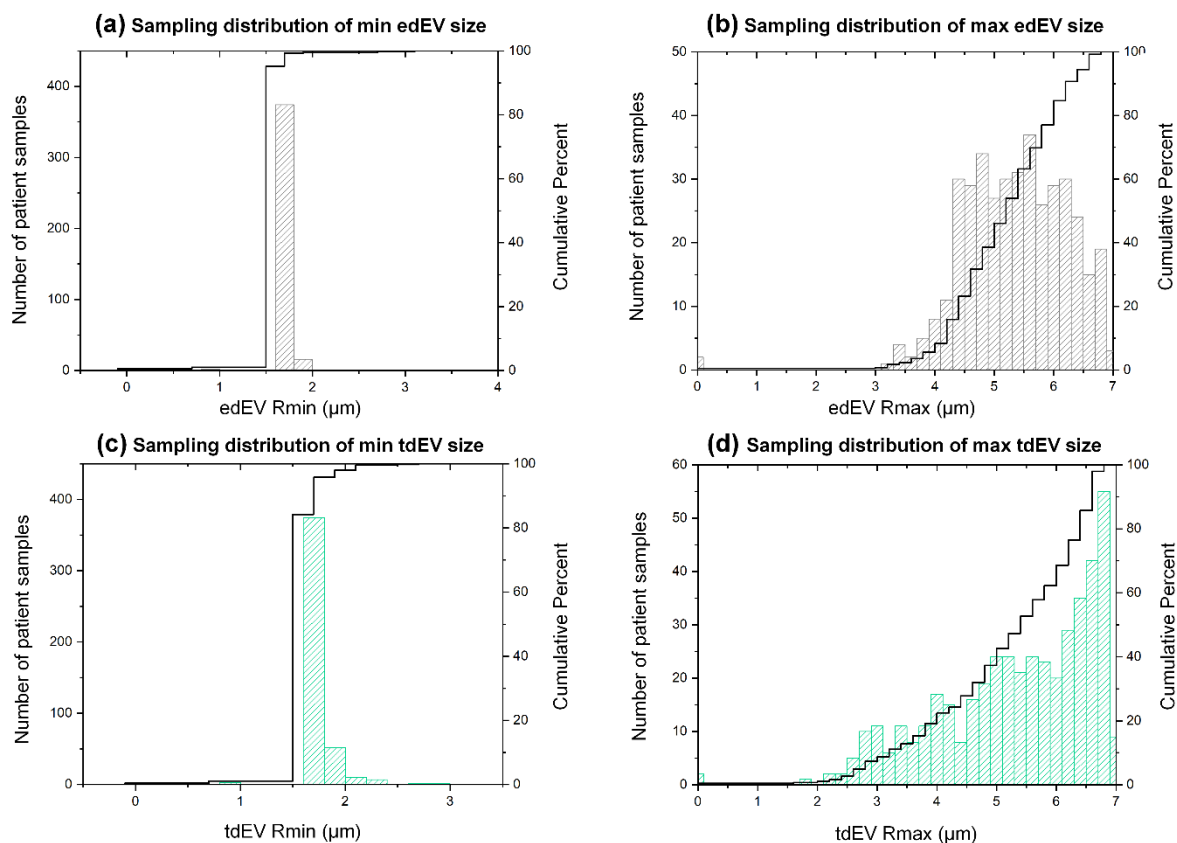

**Figure S1.** Sampling distributions of min edEV size (a), max edEV size (b), min tdEV size (c) and max tdEV size (d). The black lines in each graph correspond to the respective cumulative distributions.

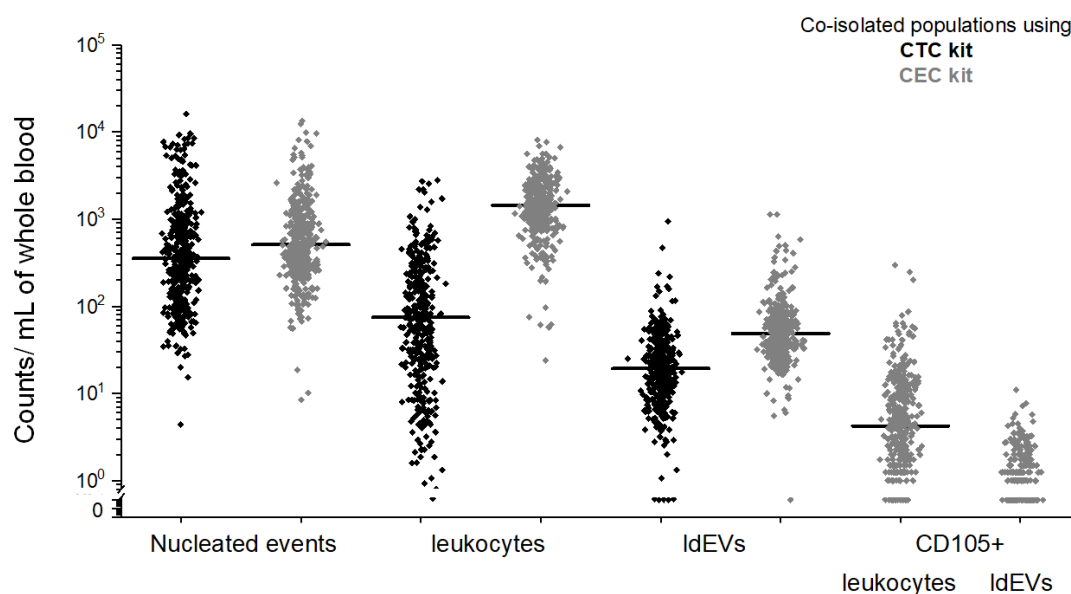

**Figure S2.** Frequencies of different populations co-isolated with the CTC (black dots) and CEC kits (grey dots), normalized to 1 mL of blood for comparison between the kits.

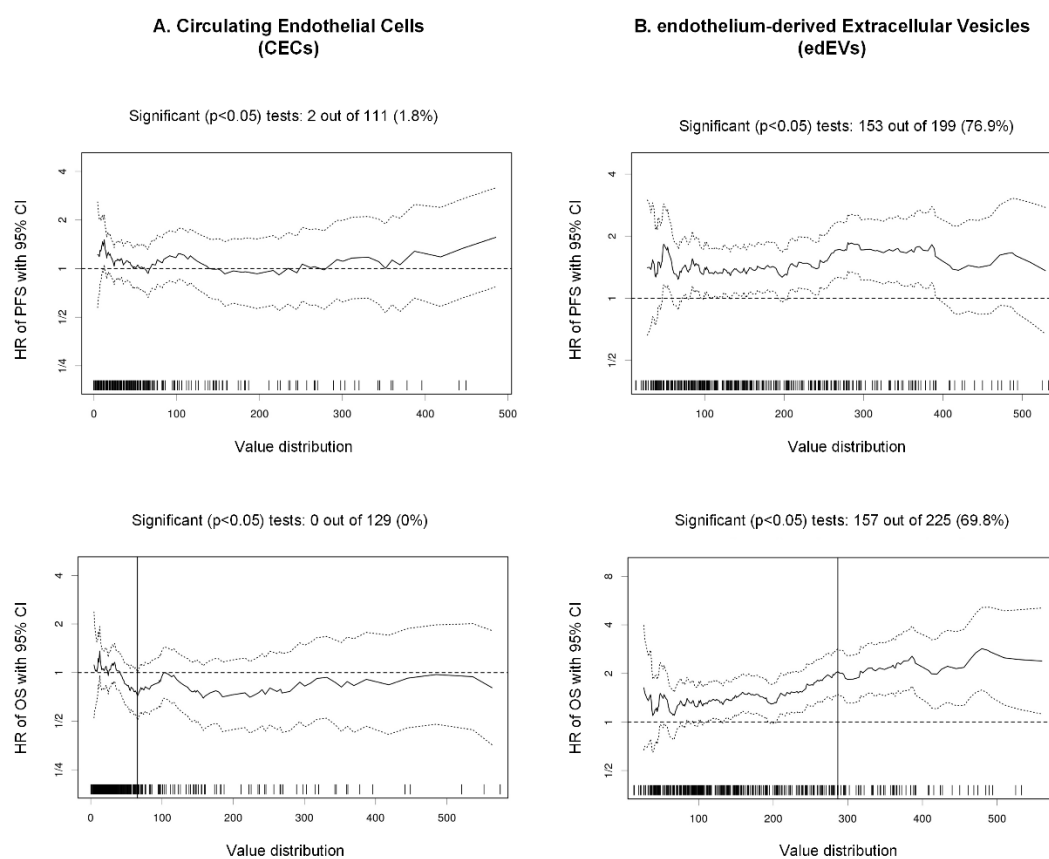

**Figure S3.** Cut-off optimization of the baseline values for CECs (A) and edEVs (B) in mCRC patients. For each possible cut-off, CECs and edEVs were correlated with PFS (top) or OS (bottom). The HR including 95% CI was plotted in dependence of the cutoff. The vertical line indicates the cut-off that results in the most significant correlation with OS. The value distribution of CECs and edEVs is shown as a rug plot at the bottom of the respective figure.

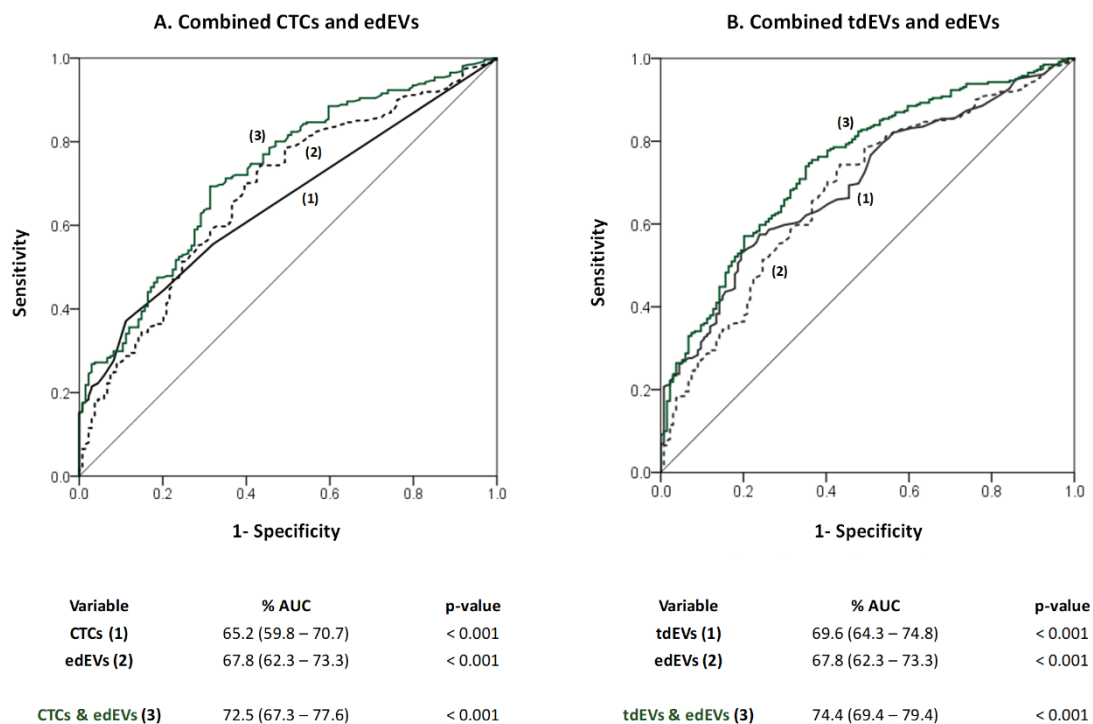

**Figure S4.** Receiver Operating Characteristic (ROC) curves treating survival time dichotomized by the median OS time of the patient cohort as the classification variable. The addition of edEVs to CTCs (A) or tdEVs (B) results in significantly ( $p < 0.05$ ) higher area under the curve (AUC) compared to solely CTCs or tdEVs.
